# Supplementary material
Source: MDPI journal article supplement (https://www.mdpi.com/2311-7524/10/2/194)

Supplementary material Figure S1: Some examples of blueberry fruit in plastic containers and heat-sealed bags prepared for storage treatments.

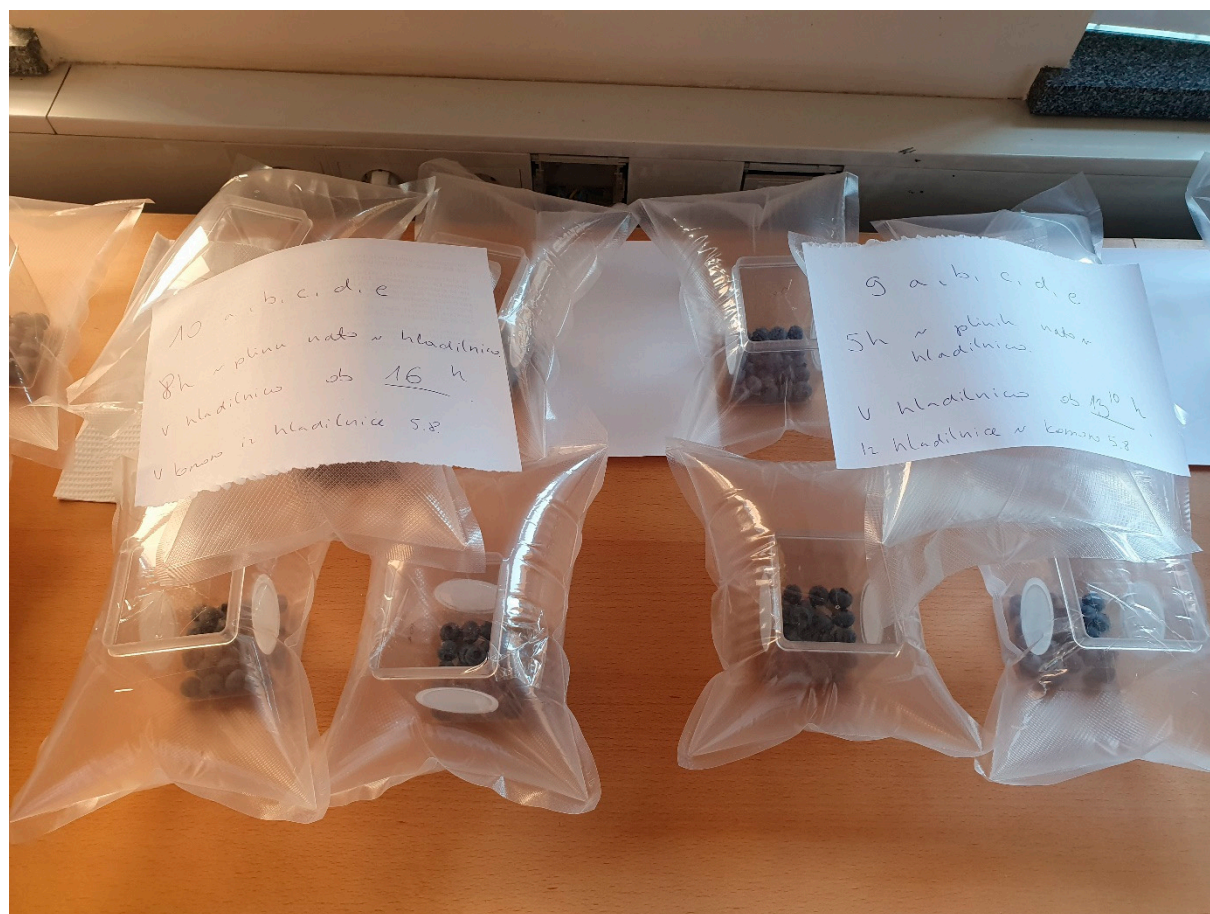

Supplement: s1 [file s1]
