# Supplementary material
Source: MDPI journal article supplement (https://www.mdpi.com/2311-7524/10/2/194)
Supplement: s1 [file s1]

Supplementary material Table S1: Individual phenolic compounds in blueberry fruit stored in regular atmosphere at 22 °C (control) at each storage duration.

| Phenolic compound                      | Control; 0.03 % CO <sub>2</sub> , 22 °C |                 |                 |                 | Significance |
|----------------------------------------|-----------------------------------------|-----------------|-----------------|-----------------|--------------|
|                                        | Harvest                                 | 24 h            | 48 h            | 72 h            |              |
| Neochlorogenic acid                    | 65.11 ± 8.74 b                          | 67.92 ± 8.67 b  | 86.21 ± 3.14 a  | 70.35 ± 2.32 b  | **           |
| Feruloylquinic acid derivative         | 27.80 ± 2.13 b                          | 23.92 ± 1.87 b  | 32.03 ± 1.88 a  | 32.94 ± 2.09 a  | ***          |
| Ferulic acid hexoside derivative       | 25.40 ± 1.90 b                          | 27.93 ± 1.85 b  | 39.76 ± 3.90 a  | 35.22 ± 2.13 a  | ***          |
| Caffeic acid hexoside                  | 23.72 ± 2.18 a                          | 18.00 ± 1.72 b  | 26.97 ± 1.78 a  | 26.05 ± 1.28 a  | ***          |
| Chlorogenic acid                       | 1167 ± 74.04 ab                         | 1250 ± 71.25 a  | 1095 ± 71.66 bc | 980.2 ± 76.07 c | **           |
| Ferulic acid hexoside                  | 8.47 ± 0.54 d                           | 10.94 ± 0.90 c  | 16.07 ± 0.68 a  | 13.88 ± 1.13 b  | ***          |
| Cryptochlorogenic acid                 | 20.72 ± 1.58 c                          | 21.50 ± 1.37 c  | 29.05 ± 1.55 a  | 25.15 ± 1.75 b  | ***          |
| 5- <i>O</i> -caffeoylshikimic acid     | 9.90 ± 0.84 ab                          | 8.82 ± 1.27 b   | 12.01 ± 0.96 a  | 10.26 ± 1.00 ab | **           |
| 5- <i>O</i> -feruloylquinic acid       | 13.04 ± 0.89 b                          | 10.29 ± 0.87 c  | 17.90 ± 1.26 a  | 16.10 ± 0.93 a  | ***          |
| Dicaffeoylquinic acid                  | 8.36 ± 0.96 b                           | 8.99 ± 1.34 b   | 12.82 ± 0.47 a  | 11.34 ± 0.87 a  | ***          |
| Ellagic acid derivative                | 56.71 ± 3.34 c                          | 48.14 ± 4.76 c  | 83.14 ± 4.59 a  | 67.30 ± 4.30 b  | ***          |
| Total phenolic acids                   | 1427 ± 93.31 ab                         | 1497 ± 91.10 a  | 1451 ± 81.16 ab | 1289 ± 90.61 b  | *            |
| Procyanidin dimer                      | 166.6 ± 9.88 c                          | 214.5 ± 18.95 b | 245.3 ± 13.72 a | 250.6 ± 12.80 a | ***          |
| Epicatechin                            | 25.29 ± 1.70 c                          | 30.97 ± 2.91 b  | 36.04 ± 1.80 a  | 35.46 ± 2.06 ab | ***          |
| Total flavan-3-ols                     | 191.8 ± 10.90 c                         | 245.5 ± 21.04 b | 281.3 ± 15.20 a | 286.1 ± 14.40 a | ***          |
| Myricetin-3- <i>O</i> -galactoside     | 15.94 ± 0.43 b                          | 12.27 ± 0.70 c  | 20.82 ± 1.08 a  | 16.09 ± 0.89 b  | ***          |
| Myricetin-3- <i>O</i> -glucoside       | 9.64 ± 1.21 b                           | 8.39 ± 1.19 b   | 17.53 ± 1.30 a  | 15.77 ± 0.41 a  | ***          |
| Quercetin-3- <i>O</i> -rutinoside      | 21.90 ± 1.45 b                          | 19.49 ± 0.84 b  | 36.46 ± 1.71 a  | 35.73 ± 0.66 a  | ***          |
| Quercetin-3- <i>O</i> -galactoside     | 12.16 ± 0.86 b                          | 12.82 ± 1.03 b  | 20.40 ± 1.57 a  | 18.91 ± 1.19 a  | ***          |
| Quercetin-3- <i>O</i> -rhamnoside      | 2.96 ± 0.29 b                           | 2.90 ± 0.31 b   | 4.88 ± 0.70 a   | 4.47 ± 0.16 a   | ***          |
| Kaempferol-3- <i>O</i> -rutinoside     | 1.51 ± 0.11 b                           | 1.60 ± 0.31 b   | 2.73 ± 0.35 a   | 2.77 ± 0.22 a   | ***          |
| Isorhamnetin-3- <i>O</i> -rutinoside   | 4.07 ± 0.35 b                           | 4.32 ± 0.12 b   | 7.35 ± 0.38 a   | 6.96 ± 1.14 a   | ***          |
| Isorhamnetin-3- <i>O</i> -hexoside     | 9.08 ± 0.70 c                           | 6.01 ± 0.14 d   | 15.08 ± 1.50 a  | 11.74 ± 0.27 b  | ***          |
| Quercetin-3- <i>O</i> -xyloside        | 10.90 ± 0.43 b                          | 10.89 ± 0.90 b  | 19.62 ± 1.39 a  | 18.52 ± 0.93 a  | ***          |
| Syringetin-3- <i>O</i> -glucoside      | 4.78 ± 0.46 b                           | 3.78 ± 0.50 b   | 8.89 ± 0.58 a   | 7.85 ± 1.04 a   | ***          |
| Quercetin-3- <i>O</i> -hexose malonate | 9.42 ± 0.59 b                           | 10.33 ± 0.50 b  | 18.06 ± 1.94 a  | 16.21 ± 0.97 a  | ***          |
| Total flavonols                        | 102.4 ± 5.61 c                          | 92.81 ± 3.63 c  | 171.8 ± 10.95 a | 155.0 ± 3.89 b  | ***          |
| Delphinidin-3- <i>O</i> -galactoside   | 149.4 ± 10.44                           | 164.2 ± 26.04   | 159.2 ± 12.64   | 159.8 ± 14.86   | NS           |
| Cyanidin-3- <i>O</i> -galactoside      | 39.02 ± 3.41                            | 44.38 ± 3.61    | 44.45 ± 3.74    | 43.52 ± 2.78    | NS           |
| Delphinidin-3- <i>O</i> -arabinoside   | 118.1 ± 12.76                           | 134.3 ± 16.75   | 134.5 ± 10.78   | 131.7 ± 7.77    | NS           |
| Petunidin-3- <i>O</i> -galactoside     | 93.85 ± 5.18 b                          | 83.44 ± 6.74 b  | 112.2 ± 9.09 a  | 117.5 ± 7.79 a  | ***          |
| Petunidin-3- <i>O</i> -glucoside       | 38.42 ± 2.43 b                          | 40.12 ± 2.89 b  | 46.41 ± 2.83 a  | 48.69 ± 2.02 a  | ***          |

|                                     |                 |                 |                 |                 |     |
|-------------------------------------|-----------------|-----------------|-----------------|-----------------|-----|
| Cyanidin-3- <i>O</i> -arabinoside   | 20.89 ± 1.85 b  | 21.81 ± 1.17 b  | 25.24 ± 0.92 a  | 26.48 ± 0.26 a  | *** |
| Malvidin-3- <i>O</i> -galactoside   | 2763 ± 116.2 b  | 2352 ± 110.0 c  | 3387 ± 64.75 a  | 3533 ± 157.8 a  | *** |
| Malvidin-3- <i>O</i> -glucoside     | 1045 ± 225.0    | 853.1 ± 212.1   | 1016 ± 149.8    | 1076 ± 73.52    | NS  |
| Malvidin-3- <i>O</i> -arabinoside   | 2203 ± 70.66 c  | 1975 ± 23.86 d  | 2927 ± 40.89 a  | 2726 ± 153.2 b  | *** |
| Malvidin-3-(6''-acetyl) galactoside | 220.7 ± 20.01 b | 181.7 ± 6.20 c  | 238.9 ± 13.05 b | 272.8 ± 14.29 a | *** |
| Malvidin-3-(6''-acetyl) glucoside   | 284.7 ± 15.55 b | 216.4 ± 18.19 c | 292.7 ± 26.3 ab | 332.3 ± 15.80 a | *** |
| Total anthocyanins                  | 6977 ± 376.0 b  | 6066 ± 316.8 c  | 8383 ± 195.7 ab | 8468 ± 156.3 a  | *** |
| Total phenolics                     | 8697 ± 483.3 b  | 7902 ± 423.9 c  | 10288 ± 256.1 a | 10198 ± 242.1 a | *** |

Data are means with corresponding standard errors (4 replicates per storage duration). Different letters (a-d) indicate significant differences between storage durations (Tukey's test,  $\alpha < 0.05$ ; \*,  $p < 0.05$ ; \*\*,  $p < 0.01$ ; \*\*\*,  $p < 0.001$ ; NS, not significant).

Supplementary material Table S2: Individual phenolic compounds in blueberry fruit stored in regular atmosphere at 2 °C at each storage duration.

| Phenolic compound                      |                 | 0.03 % CO <sub>2</sub> , 2 °C |                 |                 |              |
|----------------------------------------|-----------------|-------------------------------|-----------------|-----------------|--------------|
|                                        | Harvest         | 24 h                          | 48 h            | 72 h            | Significance |
| Neochlorogenic acid                    | 65.11 ± 8.74 a  | 66.03 ± 6.15 a                | 50.25 ± 2.66 b  | 40.70 ± 1.68 b  | ***          |
| Feruloylquinic acid derivative         | 27.80 ± 2.13 a  | 20.83 ± 1.46 bc               | 21.39 ± 0.86 b  | 18.02 ± 0.92 c  | ***          |
| Ferulic acid hexoside derivative       | 25.40 ± 1.90 a  | 18.46 ± 1.58 c                | 21.90 ± 0.98 b  | 21.02 ± 1.55 bc | ***          |
| Caffeic acid hexoside                  | 23.72 ± 2.18 a  | 17.74 ± 1.06 b                | 17.78 ± 1.68 b  | 14.72 ± 1.32 b  | ***          |
| Chlorogenic acid                       | 1167 ± 74.04 a  | 1135 ± 66.65 a                | 867.2 ± 49.74 b | 819.2 ± 63.88 b | ***          |
| Ferulic acid hexoside                  | 8.47 ± 0.54     | 8.60 ± 0.51                   | 8.69 ± 0.98     | 8.38 ± 0.34     | NS           |
| Cryptochlorogenic acid                 | 20.72 ± 1.58    | 22.43 ± 2.36                  | 20.12 ± 1.87    | 18.59 ± 1.36    | NS           |
| 5- <i>O</i> -caffeoylshikimic acid     | 9.90 ± 0.84     | 9.36 ± 0.56                   | 9.24 ± 0.33     | 8.90 ± 0.75     | NS           |
| 5- <i>O</i> -feruloylquinic acid       | 13.04 ± 0.89 a  | 9.83 ± 0.90 b                 | 11.75 ± 1.20 ab | 11.22 ± 1.16 ab | **           |
| Dicaffeoylquinic acid                  | 8.36 ± 0.96 a   | 7.80 ± 0.62 ab                | 8.06 ± 0.71 a   | 6.35 ± 0.36 b   | **           |
| Ellagic acid derivative                | 56.71 ± 3.34 a  | 52.33 ± 4.22 ab               | 48.25 ± 3.56 b  | 40.31 ± 3.07 c  | ***          |
| Total phenolic acids                   | 1427 ± 93.31 a  | 1368 ± 80.09 a                | 1085 ± 52.09 b  | 1007 ± 67.07 b  | ***          |
| Procyanidin dimer                      | 166.6 ± 9.88 b  | 207.2 ± 23.21 a               | 160.6 ± 8.26 b  | 141.9 ± 7.47 b  | ***          |
| Epicatechin                            | 25.29 ± 1.70 ab | 27.91 ± 2.34 a                | 23.80 ± 1.45 b  | 22.46 ± 1.92 b  | **           |
| Total flavan-3-ols                     | 191.9 ± 10.90 b | 235.1 ± 25.45 a               | 184.4 ± 9.13 b  | 164.3 ± 9.09 b  | ***          |
| Myricetin-3- <i>O</i> -galactoside     | 15.94 ± 0.43 ab | 12.70 ± 0.84 c                | 15.00 ± 0.52 b  | 16.36 ± 0.70 a  | ***          |
| Myricetin-3- <i>O</i> -glucoside       | 9.64 ± 1.21 ab  | 8.18 ± 0.83 b                 | 10.73 ± 0.47 a  | 10.20 ± 1.03 a  | *            |
| Quercetin-3- <i>O</i> -rutinoside      | 21.90 ± 1.45 ab | 19.09 ± 0.61 b                | 23.55 ± 2.15 a  | 19.26 ± 1.79 b  | **           |
| Quercetin-3- <i>O</i> -galactoside     | 12.16 ± 0.86 a  | 11.92 ± 1.13 a                | 11.68 ± 1.05 a  | 7.17 ± 0.58 b   | ***          |
| Quercetin-3- <i>O</i> -rhamnoside      | 2.96 ± 0.29 ab  | 2.99 ± 0.23 ab                | 3.21 ± 0.35 a   | 2.45 ± 0.39 b   | *            |
| Kaempferol-3- <i>O</i> -rutinoside     | 1.51 ± 0.11     | 1.46 ± 0.27                   | 1.82 ± 0.24     | 1.60 ± 0.21     | NS           |
| Isorhamnetin-3- <i>O</i> -rutinoside   | 4.07 ± 0.35 b   | 9.93 ± 0.34 b                 | 4.91 ± 0.29 a   | 4.30 ± 0.26     | **           |
| Isorhamnetin-3- <i>O</i> -hexoside     | 9.08 ± 0.70 a   | 5.06 ± 0.46 c                 | 7.36 ± 0.29 b   | 8.54 ± 0.62 a   | ***          |
| Quercetin-3- <i>O</i> -xyloside        | 10.90 ± 0.43 a  | 10.00 ± 0.84 ab               | 11.16 ± 1.59 a  | 8.60 ± 0.50 b   | *            |
| Syringetin-3- <i>O</i> -glucoside      | 4.78 ± 0.46 b   | 3.99 ± 0.15 c                 | 4.50 ± 0.52 b   | 6.82 ± 0.60 a   | ***          |
| Quercetin-3- <i>O</i> -hexose malonate | 9.42 ± 0.59 a   | 10.31 ± 1.84 a                | 10.87 ± 0.68 a  | 6.25 ± 0.13 b   | ***          |
| Total flavonols                        | 102.4 ± 5.61 ab | 89.67 ± 6.70 c                | 104.8 ± 5.46 a  | 91.56 ± 5.59 bc | **           |
| Delphinidin-3- <i>O</i> -galactoside   | 149.5 ± 10.44 a | 165.9 ± 18.84 a               | 99.93 ± 2.76 b  | 68.94 ± 3.91 c  | ***          |
| Cyanidin-3- <i>O</i> -galactoside      | 39.02 ± 3.41 a  | 44.06 ± 4.11 a                | 28.22 ± 2.66 b  | 18.59 ± 1.26 c  | ***          |
| Delphinidin-3- <i>O</i> -arabinoside   | 118.1 ± 12.76 a | 133.3 ± 11.69 a               | 85.40 ± 4.92 b  | 56.26 ± 3.21 c  | ***          |
| Petunidin-3- <i>O</i> -galactoside     | 93.85 ± 5.18 a  | 83.44 ± 3.52 b                | 70.98 ± 4.77 c  | 53.26 ± 3.60 d  | ***          |
| Petunidin-3- <i>O</i> -glucoside       | 38.42 ± 2.43 a  | 42.02 ± 3.48 a                | 32.75 ± 2.04 b  | 22.72 ± 2.05 c  | ***          |
| Cyanidin-3- <i>O</i> -arabinoside      | 20.89 ± 1.85 a  | 22.85 ± 1.64 a                | 17.81 ± 1.16 b  | 12.35 ± 0.90 c  | ***          |
| Malvidin-3- <i>O</i> -galactoside      | 2763 ± 116.2 a  | 1992 ± 79.11 b                | 1957 ± 72.29 b  | 1502 ± 60.61 c  | ***          |

|                                     |                 |                  |                  |                 |     |
|-------------------------------------|-----------------|------------------|------------------|-----------------|-----|
| Malvidin-3- <i>O</i> -glucoside     | 1045 ± 225.0 a  | 915.7 ± 134.2 a  | 736.6 ± 95.7 ab  | 534.2 ± 144.3 b | **  |
| Malvidin-3- <i>O</i> -arabinoside   | 2203 ± 70.66 a  | 1599 ± 97.70 b   | 1599 ± 90.74 b   | 1388 ± 65.52 c  | *** |
| Malvidin-3-(6''-acetyl) galactoside | 220.7 ± 20.01 a | 200.1 ± 19.70 ab | 167.2 ± 11.34 bc | 134.6 ± 11.76 c | *** |
| Malvidin-3-(6''-acetyl) glucoside   | 284.7 ± 15.55 a | 227.4 ± 15.99 b  | 206.4 ± 13.63 bc | 185.3 ± 2.75 c  | *** |
| Total anthocyanins                  | 6977 ± 376.0 a  | 5427 ± 314.9 b   | 5001 ± 257.5 b   | 3976 ± 237.2 c  | *** |
| Total phenolics                     | 8697 ± 483.3 a  | 7120 ± 307.7 b   | 6375 ± 275.3 c   | 5240 ± 279.2 d  | *** |

Data are means with corresponding standard errors (4 replicates per storage duration). Different letters (a-d) indicate significant differences between storage durations (Tukey's test,  $\alpha < 0.05$ ; \*,  $p < 0.05$ ; \*\*,  $p < 0.01$ ; \*\*\*,  $p < 0.001$ ; NS, not significant).

Supplementary material Table S3: Individual phenolic compounds in blueberry fruit stored in modified atmosphere with 10 % CO<sub>2</sub> at 2 °C at each storage duration.

| Phenolic compound                      | 10 % CO <sub>2</sub> , 2 °C |                 |                 |                 |              |
|----------------------------------------|-----------------------------|-----------------|-----------------|-----------------|--------------|
|                                        | Harvest                     | 24 h            | 48 h            | 72 h            | Significance |
| Neochlorogenic acid                    | 65.11 ± 8.74 a              | 72.89 ± 5.43 a  | 45.98 ± 5.32 b  | 61.40 ± 6.73 a  | ***          |
| Feruloylquinic acid derivative         | 27.80 ± 2.13 a              | 23.57 ± 1.10 b  | 22.49 ± 1.23 b  | 28.29 ± 1.66 a  | ***          |
| Ferulic acid hexoside derivative       | 25.40 ± 1.90 ab             | 28.75 ± 2.31 a  | 18.54 ± 2.47 c  | 23.84 ± 0.95 b  | ***          |
| Caffeic acid hexoside                  | 23.72 ± 2.18 a              | 18.09 ± 2.22 b  | 20.86 ± 0.63 ab | 23.82 ± 2.24 a  | **           |
| Chlorogenic acid                       | 1167 ± 74.04 a              | 1186 ± 43.17 a  | 741.4 ± 42.02 c | 1045 ± 33.68 b  | ***          |
| Ferulic acid hexoside                  | 8.47 ± 0.54 b               | 11.35 ± 0.86 a  | 7.17 ± 0.68 c   | 9.22 ± 0.16 b   | ***          |
| Cryptochlorogenic acid                 | 20.72 ± 1.58 bc             | 22.91 ± 1.98 ab | 19.13 ± 1.74 c  | 24.84 ± 1.45 a  | **           |
| 5- <i>O</i> -caffeoylshikimic acid     | 9.90 ± 0.84 b               | 9.03 ± 0.73 b   | 9.54 ± 1.03 b   | 12.24 ± 0.72 a  | ***          |
| 5- <i>O</i> -feruloylquinic acid       | 13.04 ± 0.89 b              | 11.39 ± 1.00 b  | 12.38 ± 1.27 b  | 15.72 ± 0.86 a  | ***          |
| Dicafeoylquinic acid                   | 8.36 ± 0.96 b               | 9.04 ± 0.92 ab  | 8.67 ± 0.43 ab  | 10.17 ± 0.88 a  | *            |
| Ellagic acid derivative                | 56.71 ± 3.34 ab             | 51.28 ± 4.12 b  | 41.08 ± 3.81 c  | 61.89 ± 2.93 a  | ***          |
| Total phenolic acids                   | 1427 ± 93.31 a              | 1445 ± 47.27 a  | 947.2 ± 56.51 b | 1316 ± 50.32 a  | ***          |
| Procyanidin dimer                      | 166.6 ± 9.88 c              | 195.0 ± 13.18 b | 160.5 ± 10.34 c | 224.9 ± 9.98 a  | ***          |
| Epicatechin                            | 25.29 ± 1.70 b              | 29.89 ± 2.01 a  | 25.51 ± 1.61 b  | 32.71 ± 0.53 a  | ***          |
| Total flavan-3-ols                     | 191.9 ± 10.90 c             | 224.9 ± 15.04 b | 186.1 ± 11.91 c | 257.6 ± 10.33 a | ***          |
| Myricetin-3- <i>O</i> -galactoside     | 15.94 ± 0.43 c              | 13.39 ± 0.95 d  | 17.51 ± 0.66 b  | 18.92 ± 0.08 a  | ***          |
| Myricetin-3- <i>O</i> -glucoside       | 9.64 ± 1.21 b               | 9.73 ± 1.10 b   | 11.36 ± 0.87 b  | 14.00 ± 0.64 a  | ***          |
| Quercetin-3- <i>O</i> -rutinoside      | 21.90 ± 1.45 b              | 22.90 ± 1.72 b  | 20.37 ± 1.81 b  | 29.29 ± 1.03 a  | ***          |
| Quercetin-3- <i>O</i> -galactoside     | 12.16 ± 0.86 a              | 12.41 ± 1.63 a  | 7.99 ± 1.01 b   | 13.65 ± 0.44 a  | ***          |
| Quercetin-3- <i>O</i> -rhamnoside      | 2.96 ± 0.29 bc              | 3.22 ± 0.31 b   | 2.63 ± 0.24 c   | 3.79 ± 0.16 a   | ***          |
| Kaempferol-3- <i>O</i> -rutinoside     | 1.51 ± 0.11 b               | 1.84 ± 0.28 ab  | 1.67 ± 0.36 b   | 2.28 ± 0.16 a   | **           |
| Isorhamnetin-3- <i>O</i> -rutinoside   | 4.07 ± 0.35 c               | 4.95 ± 0.18 b   | 4.50 ± 0.28 bc  | 6.14 ± 0.42 a   | ***          |
| Isorhamnetin-3- <i>O</i> -hexoside     | 9.08 ± 0.70 b               | 7.53 ± 0.27 c   | 9.56 ± 0.71 b   | 11.55 ± 0.55 a  | ***          |
| Quercetin-3- <i>O</i> -xyloside        | 10.90 ± 0.43 b              | 11.03 ± 0.96 b  | 9.00 ± 0.90 c   | 14.40 ± 1.15 a  | ***          |
| Syringetin-3- <i>O</i> -glucoside      | 4.78 ± 0.46 b               | 4.39 ± 0.41 b   | 4.67 ± 0.37 b   | 7.10 ± 0.22 a   | ***          |
| Quercetin-3- <i>O</i> -hexose malonate | 9.42 ± 0.59 ab              | 11.14 ± 1.49 a  | 7.33 ± 0.75 b   | 11.29 ± 1.47 a  | **           |
| Total flavonols                        | 102.4 ± 5.61 b              | 102.5 ± 7.78 b  | 96.59 ± 6.82 b  | 132.4 ± 5.45 a  | ***          |
| Delphinidin-3- <i>O</i> -galactoside   | 149.5 ± 10.44 a             | 137.1 ± 9.09 a  | 105.9 ± 7.35 b  | 132.9 ± 14.48 a | ***          |
| Cyanidin-3- <i>O</i> -galactoside      | 39.02 ± 3.41 ab             | 40.39 ± 2.16 a  | 25.23 ± 1.38 c  | 34.23 ± 2.48 b  | ***          |
| Delphinidin-3- <i>O</i> -arabinoside   | 118.1 ± 12.76 a             | 122.2 ± 7.44 a  | 76.37 ± 5.26 b  | 103.6 ± 1.55 a  | ***          |
| Petunidin-3- <i>O</i> -galactoside     | 93.85 ± 5.18 ab             | 79.87 ± 6.92 c  | 81.40 ± 3.62 bc | 97.92 ± 8.94 a  | **           |
| Petunidin-3- <i>O</i> -glucoside       | 38.42 ± 2.43 ab             | 34.71 ± 3.05 bc | 31.24 ± 1.59 c  | 42.46 ± 3.25 a  | ***          |

|                                     |                 |                 |                  |                 |     |
|-------------------------------------|-----------------|-----------------|------------------|-----------------|-----|
| Cyanidin-3- <i>O</i> -arabinoside   | 20.89 ± 1.85 ab | 18.87 ± 1.81 bc | 16.98 ± 0.66 c   | 23.09 ± 0.87 a  | *** |
| Malvidin-3- <i>O</i> -galactoside   | 2763 ± 116.2 a  | 2467 ± 98.24 b  | 2157 ± 56.44 c   | 2619 ± 28.41 ab | *** |
| Malvidin-3- <i>O</i> -glucoside     | 1045 ± 225.0    | 753.2 ± 204.1   | 888.4 ± 164.5    | 1004 ± 141.1    | NS  |
| Malvidin-3- <i>O</i> -arabinoside   | 2203 ± 70.66 a  | 2191 ± 152.3 a  | 1778 ± 52.37 b   | 2148 ± 102.4 a  | *** |
| Malvidin-3-(6''-acetyl) galactoside | 220.7 ± 20.01 a | 171.9 ± 12.55 b | 203.3 ± 23.29 ab | 220.8 ± 20.86 a | *   |
| Malvidin-3-(6''-acetyl) glucoside   | 284.7 ± 15.55 a | 206.6 ± 13.09 b | 276.5 ± 12.30 a  | 275.3 ± 15.02 a | *** |
| Total anthocyanins                  | 6977 ± 376.0 a  | 6223 ± 449.0 bc | 5640 ± 218.3 c   | 6701 ± 330.7 ab | *** |
| Total phenolics                     | 8697 ± 483.3 a  | 7995 ± 501.2 a  | 6870 ± 283.2 b   | 8407 ± 384.2 a  | *** |

Data are means with corresponding standard errors (4 replicates per storage duration). Different letters (a-c) indicate significant differences between storage durations (Tukey's test,  $\alpha < 0.05$ ; \*,  $p < 0.05$ ; \*\*,  $p < 0.01$ ; \*\*\*,  $p < 0.001$ ; NS, not significant).

Supplementary material Table S4: Individual phenolic compounds in blueberry fruit stored in modified atmosphere with 100 % CO<sub>2</sub> at 2 °C at each storage duration.

| Phenolic compound                      | 100 % CO <sub>2</sub> , 2 °C |                 |                 |                 |              |
|----------------------------------------|------------------------------|-----------------|-----------------|-----------------|--------------|
|                                        | Harvest                      | 24 h            | 48 h            | 72 h            | Significance |
| Neochlorogenic acid                    | 65.11 ± 8.73 ab              | 78.98 ± 6.83 a  | 50.67 ± 3.84 b  | 57.07 ± 7.70 b  | ***          |
| Feruloylquinic acid derivative         | 27.80 ± 2.13 a               | 26.59 ± 1.79 a  | 20.39 ± 1.99 b  | 22.55 ± 1.05 b  | ***          |
| Ferulic acid hexoside derivative       | 25.40 ± 1.90 a               | 25.81 ± 2.23 a  | 20.92 ± 1.15 b  | 22.42 ± 1.79 ab | **           |
| Caffeic acid hexoside                  | 23.72 ± 2.18 a               | 19.52 ± 0.79 b  | 16.35 ± 1.51 b  | 18.49 ± 1.33 b  | ***          |
| Chlorogenic acid                       | 1167 ± 74 b                  | 1355 ± 69.31 a  | 871.3 ± 68.07 c | 956.3 ± 67.09 c | ***          |
| Ferulic acid hexoside                  | 8.47 ± 0.54 c                | 11.33 ± 1.05 a  | 9.24 ± 0.73 bc  | 10.05 ± 0.54 ab | ***          |
| Cryptochlorogenic acid                 | 20.72 ± 1.58 b               | 27.77 ± 1.88 a  | 20.27 ± 2.02 b  | 21.66 ± 0.82 b  | ***          |
| 5- <i>O</i> -caffeoylshikimic acid     | 9.90 ± 0.84 b                | 12.93 ± 0.79 a  | 8.39 ± 0.92 b   | 9.33 ± 0.85 b   | ***          |
| 5- <i>O</i> -feruloylquinic acid       | 13.04 ± 0.89 ab              | 14.13 ± 1.24 a  | 11.45 ± 1.26 b  | 13.14 ± 1.00 ab | *            |
| Dicaffeoylquinic acid                  | 8.36 ± 0.96 b                | 10.27 ± 0.91 a  | 7.49 ± 0.66 b   | 7.91 ± 0.38 b   | **           |
| Ellagic acid derivative                | 56.71 ± 3.34 bc              | 70.31 ± 5.77 a  | 50.06 ± 3.37 c  | 59.39 ± 4.59 b  | ***          |
| Total phenolic acids                   | 1427 ± 93.3 b                | 1652 ± 87.19 a  | 1087 ± 79.5 c   | 1198 ± 82.5 c   | ***          |
| Procyanidin dimer                      | 166.6 ± 9.9 c                | 236.6 ± 17.69 a | 150.8 ± 14.23 c | 195.8 ± 8.66 b  | ***          |
| Epicatechin                            | 25.29 ± 1.70 c               | 33.74 ± 1.16 a  | 22.12 ± 2.02 c  | 29.21 ± 1.63 b  | ***          |
| Total flavan-3-ols                     | 191.8 ± 10.90 c              | 270.3 ± 18.07 a | 172.9 ± 16.07 c | 225.0 ± 9.25 b  | ***          |
| Myricetin-3- <i>O</i> -galactoside     | 15.94 ± 0.43 a               | 16.95 ± 1.17 a  | 15.17 ± 1.16 ab | 13.26 ± 1.52 b  | **           |
| Myricetin-3- <i>O</i> -glucoside       | 9.64 ± 1.21                  | 12.14 ± 1.36    | 10.39 ± 1.39    | 11.68 ± 1.15    | NS           |
| Quercetin-3- <i>O</i> -rutinoside      | 21.90 ± 1.45 b               | 28.22 ± 1.84 a  | 21.94 ± 1.88 b  | 26.05 ± 0.94 a  | ***          |
| Quercetin-3- <i>O</i> -galactoside     | 12.16 ± 0.86 b               | 15.52 ± 1.62 a  | 12.04 ± 1.19 b  | 13.99 ± 0.43 ab | **           |
| Quercetin-3- <i>O</i> -rhamnoside      | 2.96 ± 0.29 c                | 4.06 ± 0.30 a   | 3.10 ± 0.15 bc  | 3.54 ± 0.29 ab  | ***          |
| Kaempferol-3- <i>O</i> -rutinoside     | 1.51 ± 0.11 c                | 2.36 ± 0.27 a   | 1.65 ± 0.21 bc  | 2.16 ± 0.33 ab  | ***          |
| Isorhamnetin-3- <i>O</i> -rutinoside   | 4.07 ± 0.35 c                | 6.37 ± 0.39 a   | 4.75 ± 0.26 b   | 5.81 ± 0.18 a   | ***          |
| Isorhamnetin-3- <i>O</i> -hexoside     | 9.08 ± 0.70                  | 9.61 ± 1.28     | 7.86 ± 0.70     | 8.66 ± 0.74     | NS           |
| Quercetin-3- <i>O</i> -xyloside        | 10.90 ± 0.43 b               | 15.41 ± 0.93 a  | 8.68 ± 0.97 c   | 14.14 ± 1.10 a  | ***          |
| Syringetin-3- <i>O</i> -glucoside      | 4.78 ± 0.46 c                | 7.17 ± 0.54 a   | 5.55 ± 0.45 bc  | 6.65 ± 1.08 ab  | **           |
| Quercetin-3- <i>O</i> -hexose malonate | 9.42 ± 0.59 b                | 14.83 ± 1.20 a  | 8.73 ± 1.08 b   | 12.79 ± 1.11 a  | ***          |
| Total flavonols                        | 102.4 ± 5.61 b               | 132.6 ± 8.12 a  | 99.87 ± 6.45 b  | 118.7 ± 7.26 a  | ***          |
| Delphinidin-3- <i>O</i> -galactoside   | 149.4 ± 10.4 a               | 165.8 ± 12.6 a  | 89.81 ± 7.20 b  | 114.1 ± 20.86 b | ***          |
| Cyanidin-3- <i>O</i> -galactoside      | 39.02 ± 3.41 b               | 48.94 ± 3.62 a  | 26.85 ± 2.78 c  | 32.15 ± 2.59 c  | ***          |
| Delphinidin-3- <i>O</i> -arabinoside   | 118.1 ± 12.76 b              | 148.1 ± 3.89 a  | 81.27 ± 7.08 c  | 97.30 ± 10.34 c | ***          |
| Petunidin-3- <i>O</i> -galactoside     | 93.85 ± 5.18 a               | 85.83 ± 8.57 ab | 69.65 ± 3.75 c  | 79.04 ± 2.49 bc | ***          |
| Petunidin-3- <i>O</i> -glucoside       | 38.42 ± 2.43 ab              | 42.86 ± 3.08 a  | 29.16 ± 1.45 c  | 36.27 ± 2.84 b  | ***          |

|                                     |                 |                 |                 |                  |     |
|-------------------------------------|-----------------|-----------------|-----------------|------------------|-----|
| Cyanidin-3- <i>O</i> -arabinoside   | 20.89 ± 1.85 ab | 23.31 ± 0.89 a  | 15.86 ± 1.21 c  | 19.72 ± 0.83 b   | *** |
| Malvidin-3- <i>O</i> -galactoside   | 2763 ± 116.2 a  | 2335 ± 154.8 b  | 1929 ± 93.4 c   | 2137 ± 3.72 bc   | *** |
| Malvidin-3- <i>O</i> -glucoside     | 1045 ± 225.0    | 924.0 ± 229.8   | 664.3 ± 113.5   | 765.4 ± 167.0    | NS  |
| Malvidin-3- <i>O</i> -arabinoside   | 2203 ± 70.66 a  | 2043 ± 34.15 b  | 1542 ± 69.9 c   | 1912 ± 83.75 b   | *** |
| Malvidin-3-(6''-acetyl) galactoside | 220.7 ± 20.01 a | 190.2 ± 9.90 b  | 149.7 ± 7.68 c  | 171.6 ± 7.00 bc  | *** |
| Malvidin-3-(6''-acetyl) glucoside   | 284.7 ± 15.55 a | 229.3 ± 16.81 b | 192.8 ± 13.78 c | 210.8 ± 14.31 bc | *** |
| Total anthocyanins                  | 6977 ± 376 a    | 6236 ± 280.6 b  | 4791 ± 218.8 d  | 5575 ± 285.7 c   | *** |
| Total phenolics                     | 8697 ± 483.3 a  | 8292 ± 385.0 a  | 6150 ± 307.2 c  | 7117 ± 374.0 b   | *** |

Data are means with corresponding standard errors (4 replicates per storage duration). Different letters (a-d) indicate significant differences between storage durations (Tukey's test,  $\alpha < 0.05$ ; \*,  $p < 0.05$ ; \*\*,  $p < 0.01$ ; \*\*\*,  $p < 0.001$ ; NS, not significant).



Supplementary material Table S5: The results of one-way analysis of variance for individual phenolic compound at each storage duration.

| Phenolic compound                      | Significance 24 h | Significance 48 h | Significance 72 h |
|----------------------------------------|-------------------|-------------------|-------------------|
| Neochlorogenic acid                    | NS                | ***               | ***               |
| Feruloylquinic acid derivative         | **                | ***               | ***               |
| Ferulic acid hexoside derivative       | ***               | ***               | ***               |
| Caffeic acid hexoside                  | NS                | ***               | ***               |
| Chlorogenic acid                       | **                | ***               | **                |
| Ferulic acid hexoside                  | **                | ***               | ***               |
| Cryptochlorogenic acid                 | **                | ***               | ***               |
| 5- <i>O</i> -caffeoylshikimic acid     | ***               | ***               | ***               |
| 5- <i>O</i> -feruloylquinic acid       | ***               | ***               | ***               |
| Dicaffeoylquinic acid                  | *                 | ***               | ***               |
| Ellagic acid derivative                | ***               | ***               | ***               |
| Total phenolic acids                   | **                | ***               | ***               |
| Procyanidin dimer                      | *                 | ***               | ***               |
| Epicatechin                            | *                 | ***               | ***               |
| Total flavan-3-ols                     | *                 | ***               | ***               |
| Myricetin-3- <i>O</i> -galactoside     | ***               | ***               | ***               |
| Myricetin-3- <i>O</i> -glucoside       | **                | ***               | ***               |
| Quercetin-3- <i>O</i> -rutinoside      | ***               | ***               | ***               |
| Quercetin-3- <i>O</i> -galactoside     | *                 | ***               | ***               |
| Quercetin-3- <i>O</i> -rhamnoside      | ***               | ***               | ***               |
| Kaempferol-3- <i>O</i> -rutinoside     | ***               | ***               | ***               |
| Isorhamnetin-3- <i>O</i> -rutinoside   | ***               | ***               | ***               |
| Isorhamnetin-3- <i>O</i> -hexoside     | ***               | ***               | ***               |
| Quercetin-3- <i>O</i> -xyloside        | ***               | ***               | ***               |
| Syringetin-3- <i>O</i> -glucoside      | ***               | ***               | NS                |
| Quercetin-3- <i>O</i> -hexose malonate | **                | ***               | ***               |
| Total flavonols                        | ***               | ***               | ***               |
| Delphinidin-3- <i>O</i> -galactoside   | NS                | ***               | ***               |
| Cyanidin-3- <i>O</i> -galactoside      | *                 | ***               | ***               |
| Delphinidin-3- <i>O</i> -arabinoside   | *                 | ***               | ***               |
| Petunidin-3- <i>O</i> -galactoside     | NS                | ***               | ***               |
| Petunidin-3- <i>O</i> -glucoside       | *                 | ***               | ***               |
| Cyanidin-3- <i>O</i> -arabinoside      | **                | ***               | ***               |
| Malvidin-3- <i>O</i> -galactoside      | ***               | ***               | ***               |
| Malvidin-3- <i>O</i> -glucoside        | NS                | *                 | ***               |
| Malvidin-3- <i>O</i> -arabinoside      | ***               | ***               | ***               |
| Malvidin-3-(6''-acetyl)<br>galactoside | NS                | ***               | ***               |
| Malvidin-3-(6''-acetyl)<br>glucoside   | NS                | ***               | ***               |
| Total anthocyanins                     | *                 | ***               | ***               |
| Total phenolics                        | *                 | ***               | ***               |

Significant differences were determined via Tukey's test ( $\alpha < 0.05$ ). \*,  $p < 0.05$ ; \*\*,  $p < 0.01$ ;

\*\*\*,  $p < 0.001$ ; NS, not significant.
